1 **Genetic variants are identified to increase risk of COVID-19 related mortality from**

2 **UK Biobank data**

3 Jianchang Hu<sup>1</sup>, Cai Li<sup>1</sup>, Shiyang Wang, Ting Li, Heping Zhang\*

4 Department of Biostatistics, Yale University

5 <sup>1</sup>Co-first Author

6 \*Correspondence Author

7 Email: [heping.zhang@yale.edu](mailto:heping.zhang@yale.edu)

8 300 George Street, Ste 523, New Haven, CT, 06511

9

10

11

12

13

14

15

16

17

18

19

20 **Abstract**

21 ***Background***

22 The severity of coronavirus disease 2019 (COVID-19) caused by the severe acute  
23 respiratory syndrome coronavirus 2 (SARS-CoV-2) is highly heterogenous. Studies have  
24 reported that males and some ethnic groups are at increased risk of death from COVID-  
25 19, which implies that individual risk of death might be influenced by host genetic  
26 factors.

27 ***Methods***

28 In this project, we consider the mortality as the trait of interest and perform a genome-  
29 wide association study (GWAS) of data for 1,778 infected cases (445 deaths, 25.03%)  
30 distributed by the UK Biobank. Traditional GWAS failed to identify any genome-wide  
31 significant genetic variants from this dataset. To enhance the power of GWAS and  
32 account for possible multi-loci interactions, we adopt the concept of super-variant for the  
33 detection of genetic factors. A discovery-validation procedure is used for verifying the  
34 potential associations.

35 ***Results***

36 We find 8 super-variants that are consistently identified across multiple replications as  
37 susceptibility loci for COVID-19 mortality. The identified risk factors on Chromosomes  
38 2, 6, 7, 8, 10, 16, and 17 contain genetic variants and genes related to cilia dysfunctions  
39 (*DNAH7* and *CLUAP1*), cardiovascular diseases (*DES* and *SPEG*), thromboembolic  
40 disease (*STXBP5*), mitochondrial dysfunctions (*TOMM7*), and innate immune system

41 (*WSBI*). It is noteworthy that *DNAH7* has been reported recently as the most  
42 downregulated gene after infecting human bronchial epithelial cells with SARS-CoV2.

### 43 ***Conclusions***

44 Eight genetic variants are identified to significantly increase risk of COVID-19 mortality  
45 among the patients with white British ancestry. These findings may provide timely  
46 evidence and clues for better understanding the molecular pathogenesis of COVID-19  
47 and genetic basis of heterogeneous susceptibility, with potential impact on new  
48 therapeutic options.

### 49 ***Keywords***

50 COVID-19, GWAS, Host genetic factors, Mortality, SARS-CoV2, UK Biobank

51

52

53

54

55

56

57

58

59

## 60 **Introduction**

61 Coronavirus disease 2019 (COVID-19) is a highly infectious disease caused by the severe  
62 acute respiratory syndrome coronavirus 2 (SARS-CoV-2). The pneumonia was first  
63 reported in December 2019 in Wuhan, Hubei Province, China, followed by an outbreak  
64 across the country [1, 2]. As of September 8th, 2020, the pandemic of COVID-19 has  
65 rapidly spread worldwide and caused over 27 million infected cases and 891,000 deaths  
66 (3.3%) according to JHU COVID-19 dashboard [3]. Currently, the effective therapeutic  
67 measures available to counteract the SARS-CoV-2 are limited. While studies have been  
68 dedicated to investigating the clinical features, epidemiological characteristics of  
69 COVID-19 [4-11], and genomic characterization of SARS-CoV-2 [12], few are through  
70 the lens of statistical genetics and the host genetic factors contributing to COVID-19  
71 remain largely enigmatic [13, 14]. Moreover, the severity of COVID-19 and course of the  
72 infection is highly heterogenous. The majority of COVID-19 cases only have mild or no  
73 symptoms, while some of the patients develop serious health outcomes. A UK cross-  
74 sectional survey of 20,133 patients who were hospitalized with COVID-19 showed that  
75 patients with diabetes, cardiovascular diseases, hypertension, or chronic respiratory  
76 diseases were at higher risk of death [15]. More importantly, evidence has shown that  
77 males and some ethnic groups have increased risk of death from COVID-19 [16-20].  
78 These observations suggest that there might be host genetic determinants which  
79 predispose the subgroup of patients to more severe COVID-19 outcomes. Undoubtedly,  
80 there is an urgent need for understanding host genetic basis of heterogeneous  
81 susceptibility to COVID-19 and uncovering genetic risk factors. Current studies mainly  
82 focus on investigating associations between host genetic factors and infection or

83 respiratory failure [13, 14]. Obviously, infection may only be partially explained by  
84 genetic factors since exposure to the virus could be more important. Here, we consider  
85 the mortality as the trait of interest for our analysis.

86 As of early August 2020, UK Biobank [21, 22] has released the testing results of  
87 COVID-19 for 12,428 participants, including 1,778 (14.31%) infected cases with 445  
88 deaths related to COVID-19. This dataset accompanied by already available health care  
89 data, genetic data and death data offers a unique resource and timely opportunity for  
90 learning the host genetic determinants of COVID-19 susceptibility, severity, and  
91 mortality.

92 In this project, we perform a genome-wide association study (GWAS) exploiting the  
93 concept of super-variables in statistical genetics to identify potential risk loci contributing  
94 to the COVID-19 mortality. A super-variant is a combination of alleles in multiple loci in  
95 analogue to a gene. However, in contrast to a gene that refers to a physically connected  
96 region of a chromosome, the loci contributing to a super-variant is not restricted by its  
97 spatial location in the genome [23-25]. The rationale behind our analysis is two-fold:  
98 First, COVID-19 infections require environmental exposure and the genetic contribution  
99 may be limited relative to the environmental exposure, and the mortality may have a  
100 stronger genetic effect. Second, COVID-19 is a complex syndrome, which may reflect  
101 interacting genomic factors, and our analysis with super-variants enables leveraging gene  
102 interactions beyond the additive effects.

103

104 **Methods**

## 105 *Sample processing and genotype quality control*

106 We analyze the COVID-19 data released by UK Biobank (Category ID: 100091) [22] on  
107 August 3rd, 2020, which include in total 1,778 of COVID-19 infected cases. Here, we  
108 consider an infected case as a sample with any positive PCR test result or a death with  
109 virus found. Among infected cases, 445 of them were reported death caused directly or  
110 indirectly by COVID-19 and the remainder of 1333 patients are survivors. In our  
111 analysis, to limit the potential effect of population structure, we focus on samples from  
112 white British ancestry. After standard sample quality controls, there remain 1096 of  
113 COVID-19 infected participants, of which 292 were deaths (26.64%) and 804 were  
114 survivors. Their imputed genotype data (Field ID: 22801-22822) and clinical variables  
115 including gender and age (Field ID: 31, 34) are all accessible from UK Biobank [21].

116 Our analysis makes use of imputed single-nucleotide polymorphism (SNP) datasets from  
117 UK Biobank. SNPs with duplicated names and positions are excluded. After standard  
118 genotyping quality control, where variants with low call rate (missing probability  $\geq 0.05$ )  
119 and disrupted Hardy-Weinberg equilibrium ( $p\text{-value} < 1 \times 10^{-6}$ ) are removed, we retain in  
120 total 18,617,478 SNPs. We divide the whole SNP dataset into 2734 non-overlapping  
121 local sets according to the physical position so that each set consists of SNPs within a  
122 segment of physical length 1 Mb.

## 123 *Statistical analysis*

124 We consider the concept of super-variant for GWAS. A super-variant is a combination of  
125 alleles in multiple loci, but unlike a gene that refers to a physically connected region of  
126 chromosome, the loci contributing to a super-variant can be anywhere in the genome [24,

127 25]. The super-variant is suggested to be powerful and stable in association studies as it  
128 aggregates the strength of individual signals. In addition, it accounts for potential  
129 complex interactions between different genes even when they are located remotely. To  
130 identify significant super-variants, a local ranking and aggregation method is adopted.  
131 Chromosomes are divided into local SNP sets. Within each set, random forest technique  
132 is utilized to obtain the so-called depth importance measure of each SNP which leads to a  
133 ranking of SNPs in terms of their importance. Top SNPs within each local set are then  
134 aggregated into a super-variant. In addition, two modes of transmission, dominant and  
135 recessive modes are both considered for the super-variant identification. We refer the  
136 readers to [25] for details.

137 Our analysis considers the following discovery-validation procedure. The complete  
138 dataset is randomly divided into two sets, one for discovery and the other for verification.  
139 Each set consists of 146 deaths and 402 survivors. We apply the aforementioned ranking  
140 and aggregation method for super-variant identification on the discovery dataset. After  
141 the discovery of the super-variants, we then investigate their associations with the death  
142 outcomes of COVID-19 through logistic regression in the verification and complete  
143 datasets. Age and gender are considered in the regression analyses as confounders to  
144 remove potential bias. We use  $1.83 \times 10^{-5}$  (i.e.,  $0.05/2734$ ) as the threshold for super-  
145 variant-level association on the discovery dataset since 2,734 SNP sets are considered. A  
146 super-variant is verified if its logistic regression coefficient achieves the level of 0.05  
147 significance on the verification dataset and super-variant-level significance on the  
148 complete dataset.

149 To ascertain the stability of the associations, we repeat the above procedure for 10 times,  
150 and retain the verified super-variants and their contributing SNPs. Finally, for super-  
151 variants that are consistently verified across multiple runs, we conduct Cox regressions  
152 with adjustment for age and gender in the complete dataset to further validate their  
153 associations.

154

## 155 **Results**

156 We find 216 different verified super-variants across 10 repetitions of the discovery-  
157 validation procedure. More importantly, there are two super-variants, chr6\_148 and  
158 chr7\_23, identified in 4 out of 10 repetitions. In addition, there are 6 super-variants,  
159 chr2\_197, chr2\_221, chr8\_99, chr10\_57, chr16\_4 and chr17\_26 identified in 3 out of 10  
160 repetitions. According to the binomial distribution, the probability of a super-variant  
161 being verified in 4 (3) out of 10 repetitions by chance is at most 0.00096 (0.0105) if p-  
162 value in the verification dataset is assumed to be uniformly distributed.

163 In terms of the SNPs contributing to these 8 super-variants, there exist SNPs selected  
164 multiple times across different repetitions. Specifically, for chr6\_148, SNP rs117928001  
165 is a contributing SNP in all 4 times when this super-variant is verified, and there are other  
166 94 contributing SNPs selected 3 times. Similarly, for chr7\_23, SNP rs1322746 is a  
167 contributing SNP in 3 repetitions when this super-variant is verified, and other 4 SNPs  
168 are selected 2 times. For super-variant chr2\_197 which is identified in 3 out of 10  
169 repetitions, SNPs rs34011564 and rs71040457 are both contributing SNPs in all 3 times.  
170 For chr8\_99, SNPs rs4735444 and rs531453964 are contributing SNPs of verified super-



171 variants in all 3 repetitions. SNPs rs117217714, rs2176724, rs9804218 and rs2301762 are  
172 contributing SNPs for chr17\_26, chr2\_197, chr10\_57 and chr16\_4 in all 3 repetitions  
173 when these super-variants are verified, respectively. We calculate minor allele frequency  
174 (MAF), odds ratio (OR), and p-value for the contributing SNPs of the 8 super-variants  
175 based on the complete dataset. See Table S1 in Additional file 1 for the details of all  
176 contributing SNPs which are selected in at least 2 repetitions.

177 We use SNPs which are selected in at least 2 repetitions to representatively form 8 super-  
178 variants according to the same mode of transmission (dominant/recessive) when they are  
179 discovered. Table 1 gives their effects estimated from univariate logistic regression and  
180 Cox regression with adjustment for sex and age in the complete dataset. For the logistic  
181 regression, all of them achieve super-variant-level significance (i.e., p-value  $< 1.83 \times 10^{-5}$ ).  
182 The strongest signal in terms of p-value is given by chr7\_23 (p-value =  $9.5 \times 10^{-9}$ ), and the  
183 largest odds ratio appears at chr17\_26 (OR = 4.237). For the Cox regression, the largest  
184 individual hazards ratio (HR) appears at chr17\_26 (HR = 2.956) as well, and the smallest  
185 individual p-value is given by chr2\_221 (p-value =  $5.2 \times 10^{-9}$ ). Table 2 lists the details of  
186 representative contributing SNPs with high selection frequency and important gene  
187 mapping results of the 8 super-variants. Figure 1 shows that the survival probabilities of  
188 the patients with identified super-variants remarkably drop during the first 20 days since  
189 testing, suggesting of risk genotypes. Figure 2 presents the survival probabilities stratified  
190 by the number of super-variants. The HR of super-variants is 1.778 with 95% CI being  
191 [1.593, 1.985], and the associated p-value is  $1.1 \times 10^{-24}$ , while the p-values of sex and age  
192 are  $1.2 \times 10^{-2}$  (HR = 1.489, male) and  $2.9 \times 10^{-18}$  (HR = 1.107), respectively. The survival

193 probability of patients with more than 3 super-variants dramatically decreases to around  
194 0.6 during the first three weeks.

195 In addition, we use a chi-square test for independence to investigate whether there are  
196 any gender differences among distribution of these 8 super-variants as well as differences  
197 among distribution of contributing SNPs. For super-variants, chr2\_197 has p-value  
198 0.0579 when all samples are considered. The frequency of presenting this super-variant  
199 among males and females is 18.09% and 22.93%, respectively. For contributing SNPs,  
200 rs4346407 on chromosome 2 has p-value 0.050 when all samples are considered, and SNP  
201 10:56525802\_CT\_C has p-value 0.0078 when only death cases are considered. The  
202 distributions of these two SNPs are given in Table 3.

203

## 204 **Discussion**

205 As the COVID-19 pandemic creates a global crisis of overwhelming morbidity and  
206 mortality, it is urgent and imperative to provide insights into how host genetic factors link  
207 to clinical outcomes. With the timely release of UK Biobank COVID-19 dataset, we  
208 perform a GWAS study for detecting genetic risk factors for COVID-19 mortality.  
209 However, due to the limited sample size, the traditional single SNP GWAS has low  
210 power in signal detection which is evidenced by the Manhattan plot shown in Figure 3.  
211 This traditional association analysis is also conducted on the same samples with white  
212 British ancestry and controlled for gender and age. As demonstrated, the traditional single  
213 SNP analysis method is unable to detect any genome-wide significant association with

214 commonly used threshold  $5 \times 10^{-8}$ , which motivates us to consider the concept of super-  
215 variant for GWAS study.

216 Although the identified super-variants are similarly distributed in males and females, the  
217 results presented in Table 3 suggest that males tend to present more minor alleles for two  
218 contributing SNPs rs4346407 and 10:56525802\_CT\_C which potentially increase their  
219 risk of COVID-19 mortality. Such a phenomenon of higher risk for males has been  
220 reported in recent studies [17, 18, 26, 27].

221 The identified super-variants are mapped to annotated genes. The most interesting signal  
222 appears on chromosome 2 in the super-variant chr2\_197. Within this super-variant, SNPs  
223 rs200008298, rs183712207, and rs191631470 are located in gene *DNAH7*. This gene  
224 encodes dynein axonemal heavy chain 7, which is a component of the inner dynein arm  
225 of ciliary axonemes. Gene Ontology (GO) annotations related to this gene include cilia  
226 movement and microtubule motor activity. A recently published paper showed that gene  
227 *DNAH7* is the most downregulated gene after infecting human bronchial epithelial cells  
228 with SARS-CoV2 [28]. The authors of that study speculated that the down-regulation of  
229 gene *DNAH7* causes the reduction of function of respiratory cilia. Our results suggest that  
230 COVID-19 patients with variations in gene *DNAH7* have higher risk for dying from  
231 COVID-19. We hypothesize that the disruption of *DNAH7* gene function may result in  
232 ciliary dysmotility and weakened mucociliary clearance capability, which leads to severe  
233 respiratory failure, a likely cause of COVID-19 death [29]. In addition, within the super-  
234 variant chr2\_197, SNPs rs4578880 and rs113892140 are located in gene *SLC39A10*,  
235 which encodes a zinc transporter. This gene plays an important role in mediating immune  
236 cell homeostasis. It has been reported to facilitate antiapoptotic signaling during early B-

237 cell development [30], modulate B-cell receptor signal strength [31], and control  
238 macrophage survival [32].

239 Signal at super-variant chr16\_4 is also related to cilia. This super-variant consists of a  
240 single SNP rs2301762, which is located in gene *CLUAPI*. This gene encodes clusterin-  
241 associated protein 1. It is an evolutionarily conserved protein required for ciliogenesis  
242 [33], and its GO annotations include intraciliary transport involved in cilium assembly.  
243 Our findings evidence the importance of respiratory cilia functioning properly in  
244 COVID-19 patients, which may be an important site in host-pathogen interaction during  
245 SARS-CoV2 infection of airways [34] as well as a potential therapeutic target [35].

246 It is noteworthy that both super-variants chr2\_197 and chr16\_4 are related to cilia, which  
247 plays a crucial role in SARS-CoV-2 infection. Studies have reported that the angiotensin-  
248 converting enzyme II (ACE2) receptors on oral and nasal epithelium cells are the main  
249 portal for SARS-CoV-2 infection and transmission [36, 37]. Viral proliferation in the  
250 airway disrupts the structure and function of ciliated epithelium, causes ciliary dyskinesia  
251 and leads to lower respiratory tract infection [38]. Moreover, it has been reported that  
252 dysfunctions in olfactory cilia lead to loss of smell (anosmia), a COVID-19 associated  
253 symptom, and coronavirus hijacks the ciliated cells and causes deciliation in the human  
254 nasal epithelium [39].

255 Chr2\_221 consists of 3 SNPs. SNP rs71040457 is located in the downstream of gene  
256 *DES* (distance = 3322 bp) and the upstream of gene *SPEG* (distance = 4917 bp). Gene  
257 *DES* encodes a muscle-specific class III intermediate filament. Its GO annotations  
258 include protein binding, structural constituent of cytoskeleton, and regulation of heart  
259 contraction. Gene *SPEG* encodes striated muscle enriched protein kinase, whose

260 functions are related to protein kinase activity and muscle cell differentiation. Mutations  
261 in both gene *DES* and *SPEG* are reported to be associated with cardiomyopathy [40-42].  
262 Several studies have reported cardiomyopathy in COVID-19 patients [43, 44], and acute  
263 myocardial damage caused by SARS-CoV-2 greatly increases the difficulty and  
264 complexity of patient treatment [45].

265 Chr7\_23 is composed by five intergenic variant SNPs. Among them, SNP rs55986907 is  
266 an expression quantitative trait loci (eQTL) of gene *TOMM7* in multiple tissues,  
267 including whole blood, lung, adipose, thyroid, skin, nerve, and esophagus based on the  
268 Genotype-Tissue Expression (GTEx) database. The gene product of *TOMM7* is a subunit  
269 of the translocase of the outer mitochondrial membrane, and plays a role in regulating the  
270 assembly and stability of the translocase complex [46]. A study discussed that intra and  
271 extracellular mitochondrial function can be impacted by SARS-CoV-2, which may be  
272 related to the hyper-inflammatory state termed as the “cytokine storm” found in COVID-  
273 19 patients, with contributions to the progression and severity of the disease [47]. Super  
274 variant chr6\_148 contains 101 SNPs. Eighty-nine of them are located in gene  
275 *STXBP5* and six of them are located in gene *STXBP5-AS1*. On the one hand, gene  
276 *STXBP5* encodes a syntaxin 1 binding protein. Its GO annotations include  
277 neurotransmitter release and regulation of synaptic vesicle exocytosis. Genome-wide  
278 association studies have found the association between *STXBP5* and Von Willebrand  
279 factor (VWF) plasma level in humans [48, 49], which is a predictor for the risk of  
280 myocardial infarction and thrombosis. A study showed that gene *STXBP5* inhibits  
281 endothelial exocytosis and promotes platelet secretion, and the variation  
282 within *STXBP5* is a genetic risk for venous thromboembolic disease [50]. COVID-19

283 leads to excessive inflammation, platelet activation, endothelial dysfunction, and stasis,  
284 which may predispose patients to venous and arterial thrombotic disease [51]. On the  
285 other hand, studies have revealed that *STXBP5-AS1* encodes a long noncoding RNA,  
286 which inhibits cell proliferation, migration, and invasion via preventing the  
287 phosphatidylinositol 3 kinase/protein kinase B (PI3K/AKT) signaling pathway against  
288 *STXBP5* expression in non-small-cell lung carcinoma and gastric cancer cells [52, 53].  
289 Our results suggest that the variations within *STXBP5/STXBP5-AS1* and the interaction  
290 between them may result in increased risk of death among COVID-19 patients through  
291 the mechanism related to endothelial exocytosis.

292 Chr17\_26 is composed by three intergenic variant SNPs. Among them, SNP rs60811869  
293 is an eQTL of gene *WSBI* in Artery-Tibial tissue based on the GTEx database. Gene  
294 *WSBI* encodes a member of the WD-protein subfamily, which is highly expressed in  
295 spleen and lung [54]. Its related pathways include innate immune system and Class I  
296 MHC mediated antigen processing and presentation. This gene has been reported to  
297 function as a Lnterleukin-21(IL-21) receptor binding molecule, which enhances the  
298 maturation of IL-21 receptor [55]. Variations in this gene may result in disrupted  
299 functions of immune system and lead to higher death rate among COVID-19 patients.

300 Super-variant chr10\_57 contains 11 SNPs and all of them are located in gene *PCDH15*.  
301 This gene is a member of the cadherin superfamily, which encodes a Calcium-dependent  
302 cell-adhesion protein. Gene *PCDH15* is essential for maintenance of normal retinal and  
303 cochlear function.

304 Super-variant chr8\_99 is composed by 7 SNPs. All the SNPs are located in gene *CPQ*,  
305 which encodes carboxypeptidase Q. GO annotations of this gene include protein  
306 homodimerization activity and carboxypeptidase activity.

307 Although the roles of genes *PCDH15* and *CPQ* in viral infection remain largely unclear,  
308 our results warrant future investigation to learn the relationship between genetic  
309 variations and the severe COVID-19 outcomes.

310 Our study is restricted by the limited sample size. We anticipate a continuous  
311 accumulation of data in the following months and plan to iterate our analysis whenever  
312 more data become available. Furthermore, we currently focus on the population with  
313 white British ancestry of UK Biobank in the analysis, validating the identified risk factors  
314 in independent populations from other resources or ethnic groups worth further  
315 investigation.

316

## 317 **Conclusions**

318 We identify 8 potential genetic risk loci for the mortality of COVID-19. These findings  
319 may provide timely evidence and clues for better understanding the molecular  
320 pathogenesis of COVID-19 and genetic basis of heterogeneous susceptibility, with  
321 potential impact on new therapeutic options.

322

323 **Declarations**

324 *Ethics approval and consent to participate*

325 Ethical approval and participant consent were collected by UK Biobank at the time  
326 participants enrolled. This paper is an analysis of anonymized data provided by UK  
327 Biobank. According to Yale IRB, analysis of anonymized data does not constitute Human  
328 Subjects Research.

329

330 *Consent for publication*

331 Not applicable.

332

333 *Availability of data and material*

334 The data used in the study are available with the permission of the UK Biobank  
335 (<https://www.ukbiobank.ac.uk>).

336

337 *Competing interests*

338 The authors declare that they have no competing interests.

339

340 *Funding*

341 Partially funded by U.S. National Institutes of Health R01HG010171 and  
342 R01MH116527.

343



344 *Authors' contributions*

345 JH, CL, and HZ designed the study. JH, CL, SW, and TL performed the experiments and  
346 analyzed the data. All authors made critical input to the manuscript.

347

348 *Acknowledgements*

349 Zhang's research is supported in part by U.S. National Institutes of Health  
350 (R01HG010171 and R01MH116527). This research has been conducted using the UK  
351 Biobank Resource under Application Number 42009. We thank the Yale Center for  
352 Research Computing for guidance and use of the research computing infrastructure.

353

## 354 Reference

- 355 1. Zhu, N., et al., *A novel coronavirus from patients with pneumonia in China, 2019*. New  
356 England Journal of Medicine, 2020.
- 357 2. Huang, C., et al., *Clinical features of patients infected with 2019 novel coronavirus in*  
358 *Wuhan, China*. The Lancet, 2020. **395**(10223): p. 497-506.
- 359 3. Dong, E., H. Du, and L. Gardner, *An interactive web-based dashboard to track COVID-19*  
360 *in real time*. The Lancet infectious diseases, 2020. **20**(5): p. 533-534.
- 361 4. Chen, H., et al., *Clinical characteristics and intrauterine vertical transmission potential of*  
362 *COVID-19 infection in nine pregnant women: a retrospective review of medical records*.  
363 The Lancet, 2020. **395**(10226): p. 809-815.
- 364 5. Chen, N., et al., *Epidemiological and clinical characteristics of 99 cases of 2019 novel*  
365 *coronavirus pneumonia in Wuhan, China: a descriptive study*. The Lancet, 2020.  
366 **395**(10223): p. 507-513.
- 367 6. Guan, W.-j., et al., *Clinical characteristics of coronavirus disease 2019 in China*. New  
368 England Journal of Medicine, 2020.
- 369 7. Wang, D., et al., *Clinical characteristics of 138 hospitalized patients with 2019 novel*  
370 *coronavirus–infected pneumonia in Wuhan, China*. Jama, 2020. **323**(11): p. 1061-1069.
- 371 8. Xu, X.-W., et al., *Clinical findings in a group of patients infected with the 2019 novel*  
372 *coronavirus (SARS-Cov-2) outside of Wuhan, China: retrospective case series*. bmj, 2020.  
373 **368**.
- 374 9. Pan, A., et al., *Association of public health interventions with the epidemiology of the*  
375 *COVID-19 outbreak in Wuhan, China*. JAMA, 2020.
- 376 10. Li, Q., et al., *Early transmission dynamics in Wuhan, China, of novel coronavirus–infected*  
377 *pneumonia*. New England Journal of Medicine, 2020.
- 378 11. Williamson, E.J., et al., *Factors associated with COVID-19-related death using*  
379 *OpenSAFELY*. Nature, 2020. **584**(7821): p. 430-436.
- 380 12. Lu, R., et al., *Genomic characterisation and epidemiology of 2019 novel coronavirus:*  
381 *implications for virus origins and receptor binding*. The Lancet, 2020. **395**(10224): p. 565-  
382 574.
- 383 13. Ellinghaus, D., et al., *Genomewide association study of severe Covid-19 with respiratory*  
384 *failure*. New England Journal of Medicine, 2020.
- 385 14. Initiative, T.H.G., *The COVID-19 Host Genetics Initiative, a global initiative to elucidate*  
386 *the role of host genetic factors in susceptibility and severity of the SARS-CoV-2 virus*  
387 *pandemic*. European Journal of Human Genetics, 2020: p. 1.
- 388 15. Docherty, A.B., et al., *Features of 20 133 UK patients in hospital with covid-19 using the*  
389 *ISARIC WHO Clinical Characterisation Protocol: prospective observational cohort study*.  
390 bmj, 2020. **369**.
- 391 16. Stoian, A.P., et al., *Gender differences in the battle against COVID - 19: impact of*  
392 *genetics, comorbidities, inflammation and lifestyle on differences in outcomes*.  
393 International journal of clinical practice, 2020: p. e13666.
- 394 17. Sharma, G., A.S. Volgman, and E.D. Michos, *Sex differences in mortality from COVID-19*  
395 *pandemic: are men vulnerable and women protected?* JACC: Case Reports, 2020. **2**(9): p.  
396 1407-1410.
- 397 18. Jin, J.-M., et al., *Gender differences in patients with COVID-19: Focus on severity and*  
398 *mortality*. Frontiers in Public Health, 2020. **8**: p. 152.

- 399 19. Pareek, M., et al., *Ethnicity and COVID-19: an urgent public health research priority*. The  
400 Lancet, 2020. **395**(10234): p. 1421-1422.
- 401 20. Aldridge, R.W., et al., *Black, Asian and Minority Ethnic groups in England are at*  
402 *increased risk of death from COVID-19: indirect standardisation of NHS mortality data*.  
403 Wellcome Open Research, 2020. **5**(88): p. 88.
- 404 21. Sudlow, C., et al., *UK biobank: an open access resource for identifying the causes of a*  
405 *wide range of complex diseases of middle and old age*. PLoS medicine, 2015. **12**(3).
- 406 22. Armstrong, J., et al., *Dynamic linkage of COVID-19 test results between public health*  
407 *england's second generation surveillance system and UK Biobank*. [Google Scholar].  
408 Microb Genomics, 2020.
- 409 23. Song, C. and H. Zhang, *TARV: Tree - based Analysis of Rare Variants Identifying Risk*  
410 *Modifying Variants in CTNNA2 and CNTNAP2 for Alcohol Addiction*. Genetic  
411 epidemiology, 2014. **38**(6): p. 552-559.
- 412 24. Madsen, B.E. and S.R. Browning, *A groupwise association test for rare mutations using a*  
413 *weighted sum statistic*. PLoS genetics, 2009. **5**(2).
- 414 25. Hu, J., et al., *Supervariants identification for breast cancer*. Genetic Epidemiology, 2020.
- 415 26. Scully, E.P., et al., *Considering how biological sex impacts immune responses and COVID-*  
416 *19 outcomes*. Nature Reviews Immunology, 2020: p. 1-6.
- 417 27. Takahashi, T., et al., *Sex differences in immune responses that underlie COVID-19 disease*  
418 *outcomes*. Nature, 2020: p. 1-9.
- 419 28. Nunnari, G., et al., *Network perturbation analysis in human bronchial epithelial cells*  
420 *following SARS-CoV2 infection*. Experimental Cell Research, 2020: p. 112204.
- 421 29. Li, X. and X. Ma, *Acute respiratory failure in COVID-19: is it "typical" ARDS?* Critical Care,  
422 2020. **24**: p. 1-5.
- 423 30. Miyai, T., et al., *Zinc transporter SLC39A10/ZIP10 facilitates antiapoptotic signaling*  
424 *during early B-cell development*. Proceedings of the National Academy of Sciences,  
425 2014. **111**(32): p. 11780-11785.
- 426 31. Hojyo, S., et al., *Zinc transporter SLC39A10/ZIP10 controls humoral immunity by*  
427 *modulating B-cell receptor signal strength*. Proceedings of the National Academy of  
428 Sciences, 2014. **111**(32): p. 11786-11791.
- 429 32. Gao, H., et al., *Metal transporter Slc39a10 regulates susceptibility to inflammatory*  
430 *stimuli by controlling macrophage survival*. Proceedings of the National Academy of  
431 Sciences, 2017. **114**(49): p. 12940-12945.
- 432 33. Pasek, R.C., et al., *Mammalian Clusterin associated protein 1 is an evolutionarily*  
433 *conserved protein required for ciliogenesis*. Cilia, 2012. **1**(1): p. 20.
- 434 34. Kuek, L.E. and R.J. Lee, *First contact: The role of respiratory cilia in host-pathogen*  
435 *interactions in the airways*. American Journal of Physiology-Lung Cellular and Molecular  
436 Physiology, 2020.
- 437 35. Joskova, M., J. Mokry, and S. Franova, *Respiratory cilia as a therapeutic target of*  
438 *phosphodiesterase inhibitors*. Frontiers in Pharmacology, 2020. **11**.
- 439 36. Xu, H., et al., *High expression of ACE2 receptor of 2019-nCoV on the epithelial cells of*  
440 *oral mucosa*. International journal of oral science, 2020. **12**(1): p. 1-5.
- 441 37. Sungnak, W., et al., *SARS-CoV-2 entry factors are highly expressed in nasal epithelial cells*  
442 *together with innate immune genes*. Nature medicine, 2020. **26**(5): p. 681-687.
- 443 38. Curran, C.S., D.R. Rivera, and J.B. Kopp, *COVID-19 Usurps Host Regulatory Networks*.  
444 Frontiers in Pharmacology, 2020. **11**: p. 1278.
- 445 39. Li, W., M. Li, and G. Ou, *COVID - 19, cilia, and smell*. The FEBS Journal, 2020.

- 446 40. Brodehl, A., A. Gaertner-Rommel, and H. Milting, *Molecular insights into*  
447 *cardiomyopathies associated with desmin (DES) mutations*. *Biophysical reviews*, 2018.  
448 **10**(4): p. 983-1006.
- 449 41. Liu, X., et al., *Disruption of striated preferentially expressed gene locus leads to dilated*  
450 *cardiomyopathy in mice*. *Circulation*, 2009. **119**(2): p. 261.
- 451 42. Agrawal, P.B., et al., *SPEG interacts with myotubularin, and its deficiency causes*  
452 *centronuclear myopathy with dilated cardiomyopathy*. *The American Journal of Human*  
453 *Genetics*, 2014. **95**(2): p. 218-226.
- 454 43. Arentz, M., et al., *Characteristics and outcomes of 21 critically ill patients with COVID-19*  
455 *in Washington State*. *Jama*, 2020. **323**(16): p. 1612-1614.
- 456 44. Guo, T., et al., *Cardiovascular implications of fatal outcomes of patients with coronavirus*  
457 *disease 2019 (COVID-19)*. *JAMA cardiology*, 2020.
- 458 45. Zheng, Y.-Y., et al., *COVID-19 and the cardiovascular system*. *Nature Reviews Cardiology*,  
459 2020. **17**(5): p. 259-260.
- 460 46. Hönlinger, A., et al., *Tom7 modulates the dynamics of the mitochondrial outer*  
461 *membrane translocase and plays a pathway - related role in protein import*. *The EMBO*  
462 *journal*, 1996. **15**(9): p. 2125-2137.
- 463 47. Saleh, J., et al., *Mitochondria and Microbiota dysfunction in COVID-19 pathogenesis*.  
464 *Mitochondrion*, 2020.
- 465 48. Smith, N.L., et al., *Novel associations of multiple genetic loci with plasma levels of factor*  
466 *VII, factor VIII, and von Willebrand factor: The CHARGE Consortium*. *Circulation*, 2010.  
467 **121**(12): p. 1382.
- 468 49. Antoni, G., et al., *Combined analysis of three genome-wide association studies on vWF*  
469 *and FVIII plasma levels*. *BMC medical genetics*, 2011. **12**(1): p. 102.
- 470 50. Zhu, Q., et al., *Syntaxin-binding protein STXBP5 inhibits endothelial exocytosis and*  
471 *promotes platelet secretion*. *The Journal of clinical investigation*, 2014. **124**(10): p. 4503-  
472 4516.
- 473 51. Bikdeli, B., et al., *COVID-19 and Thrombotic or Thromboembolic Disease: Implications for*  
474 *Prevention, Antithrombotic Therapy, and Follow-Up: JACC State-of-the-Art Review*.  
475 *Journal of the American College of Cardiology*, 2020. **75**(23): p. 2950-2973.
- 476 52. Huang, J., et al., *Long noncoding RNA STXBP5 - AS1 inhibits cell proliferation, migration,*  
477 *and invasion via preventing the PI3K/AKT against STXBP5 expression in non - small - cell*  
478 *lung carcinoma*. *Journal of cellular biochemistry*, 2019. **120**(5): p. 7489-7498.
- 479 53. Cen, D., et al., *Long noncoding RNA STXBP5-AS1 inhibits cell proliferation, migration, and*  
480 *invasion through inhibiting the PI3K/AKT signaling pathway in gastric cancer cells*.  
481 *OncoTargets and therapy*, 2019. **12**: p. 1929.
- 482 54. Fagerberg, L., et al., *Analysis of the human tissue-specific expression by genome-wide*  
483 *integration of transcriptomics and antibody-based proteomics*. *Molecular & Cellular*  
484 *Proteomics*, 2014. **13**(2): p. 397-406.
- 485 55. Nara, H., et al., *WSB-1, a novel IL-21 receptor binding molecule, enhances the*  
486 *maturation of IL-21 receptor*. *Cellular Immunology*, 2011. **269**(1): p. 54-59.

487

488

489 **Figures and Tables**

490 Figure 1: Survival curves of 8 identified super-variants in the complete dataset. The x-  
491 axis represents days since testing, and the y-axis represents the survival probability.

492

493 Figure 2: Survival curves stratified by the number of super-variants in the complete  
494 dataset. The x-axis represents days since testing, and the y-axis represents the survival  
495 probability.

496

497 Figure 3: Manhattan plot of traditional single SNP association analysis based on samples  
498 with white British ancestry only and controlled for gender and age. The red horizontal  
499 line corresponds to the commonly adopted genome-wide significant level at  $5 \times 10^{-8}$ , and  
500 the blue horizontal line gives to the suggestive significant level at  $1 \times 10^{-5}$ . Top SNPs  
501 above the suggestive line in each chromosome are annotated.

502

503 Table 1: Marginal effects of 8 super-variants in the complete dataset.

504

505 Table 2: SNPs with high selection frequency and important gene mapping results in 8  
506 super-variants.

507

508 Table 3: Allelic distribution of contributing SNPs.

509

**Table 1 | Marginal effects of 8 super-variants in the complete dataset.**

| Dominant  | Gene                     | OR    | 95% CI of OR   | p value              | HR    | 95% CI of HR   | p value              |
|-----------|--------------------------|-------|----------------|----------------------|-------|----------------|----------------------|
| chr6_148  | <i>STXBP5/STXBP5-AS1</i> | 2.909 | [1.938, 4.365] | 1.4x10 <sup>-7</sup> | 2.048 | [1.435, 2.921] | 7.7x10 <sup>-5</sup> |
| chr8_99   | <i>CPQ</i>               | 1.923 | [1.419, 2.605] | 1.6x10 <sup>-5</sup> | 1.502 | [1.119, 2.015] | 6.7x10 <sup>-3</sup> |
| chr16_4   | <i>CLUAP1</i>            | 2.725 | [1.744, 4.259] | 7.0x10 <sup>-6</sup> | 2.123 | [1.433, 3.143] | 1.7x10 <sup>-4</sup> |
| chr17_26  | <i>WSB1</i>              | 4.237 | [2.472, 7.263] | 8.4x10 <sup>-8</sup> | 2.956 | [1.949, 4.482] | 3.4x10 <sup>-7</sup> |
| Recessive | Gene                     | OR    | 95% CI of OR   | p value              | HR    | 95% CI of HR   | p value              |
| ch2_197   | <i>DNAH7/SLC39A10</i>    | 2.553 | [1.801, 3.616] | 7.3x10 <sup>-8</sup> | 1.625 | [1.170, 2.257] | 3.8x10 <sup>-3</sup> |
| chr2_221  | <i>DES/SPEG</i>          | 2.739 | [1.893, 3.963] | 4.9x10 <sup>-8</sup> | 2.614 | [1.894, 3.609] | 5.2x10 <sup>-9</sup> |
| chr7_23   | <i>TOMM7</i>             | 2.411 | [1.774, 3.276] | 9.5x10 <sup>-9</sup> | 1.943 | [1.451, 2.603] | 8.1x10 <sup>-6</sup> |
| chr10_57  | <i>PCDH15</i>            | 2.521 | [1.736, 3.662] | 7.1x10 <sup>-7</sup> | 1.813 | [1.283, 2.561] | 7.4x10 <sup>-4</sup> |

510

511

**Table 2 | SNPs with high selection frequency and important gene mapping results in 8 super-variants.**

| Super-variant | Chr | SNP name    | position  | Minor allele | Major allele | MAF   | OR    | p-value              |
|---------------|-----|-------------|-----------|--------------|--------------|-------|-------|----------------------|
| chr2_197      | 2   | rs73060484  | 196364477 | C            | A            | 0.069 | 1.945 | 6.0x10 <sup>-4</sup> |
|               |     | rs77578623  | 196369073 | T            | C            | 0.070 | 1.939 | 6.2x10 <sup>-4</sup> |
|               |     | rs74417002  | 196384505 | G            | A            | 0.034 | 1.832 | 3.0x10 <sup>-2</sup> |
|               |     | rs73070529  | 196412097 | A            | C            | 0.048 | 2.249 | 3.6x10 <sup>-4</sup> |
|               |     | rs113892140 | 196439005 | A            | G            | 0.044 | 2.031 | 2.8x10 <sup>-3</sup> |
|               |     | rs200008298 | 196602155 | AATACT       | A            | 0.032 | 1.8   | 3.1x10 <sup>-2</sup> |
|               |     | rs183712207 | 196611282 | A            | G            | 0.007 | 4.783 | 7.7x10 <sup>-3</sup> |
|               |     | rs191631470 | 196859045 | T            | C            | 0.007 | 3.335 | 3.9x10 <sup>-2</sup> |
|               |     | rs2176724   | 196952410 | A            | G            | 0.138 | 1.484 | 6.1x10 <sup>-3</sup> |
| chr2_221      | 2   | rs71040457  | 220294782 | A            | AG           | 0.355 | 1.331 | 7.7x10 <sup>-3</sup> |
| chr6_148      | 6   | rs117928001 | 147514999 | T            | C            | 0.049 | 2.749 | 1.1x10 <sup>-5</sup> |
|               |     | rs116898161 | 147538692 | G            | A            | 0.046 | 2.541 | 6.9x10 <sup>-5</sup> |
| chr7_23       | 7   | rs13227460  | 22588381  | T            | C            | 0.278 | 1.3   | 2.6x10 <sup>-2</sup> |
|               |     | rs55986907  | 22817292  | T            | C            | 0.286 | 1.601 | 3.5x10 <sup>-5</sup> |
| chr8_99       | 8   | rs7817272   | 98140470  | C            | T            | 0.194 | 1.736 | 1.7x10 <sup>-5</sup> |
|               |     | rs4735444   | 98140991  | T            | C            | 0.201 | 1.784 | 5.8x10 <sup>-6</sup> |

|          |    |             |          |    |   |       |       |                      |
|----------|----|-------------|----------|----|---|-------|-------|----------------------|
|          |    | rs1431889   | 98141643 | C  | G | 0.193 | 1.704 | 3.5x10 <sup>-5</sup> |
|          |    | rs2874140   | 98142930 | T  | A | 0.194 | 1.694 | 4.0x10 <sup>-5</sup> |
|          |    | rs531453964 | 98143128 | CA | C | 0.185 | 1.849 | 3.2x10 <sup>-6</sup> |
|          |    | rs7007951   | 98146644 | T  | C | 0.184 | 1.711 | 4.4x10 <sup>-5</sup> |
|          |    | rs920576    | 98147539 | C  | T | 0.201 | 1.615 | 1.6x10 <sup>-4</sup> |
| chr10_57 | 10 | rs9804218   | 56495374 | G  | C | 0.357 | 1.373 | 3.3x10 <sup>-3</sup> |
| chr16_4  | 16 | rs2301762   | 3550977  | G  | C | 0.055 | 2.541 | 2.0x10 <sup>-5</sup> |
| chr17_26 | 17 | rs60811869  | 25590833 | C  | T | 0.024 | 2.966 | 6.5x10 <sup>-4</sup> |
|          |    | rs117217714 | 25987181 | C  | T | 0.013 | 6.255 | 3.3x10 <sup>-5</sup> |

512

513

| <b>Table 3  Allelic distribution of contributing SNPs.</b> |          |          |          |
|------------------------------------------------------------|----------|----------|----------|
| <b>rs4346407</b>                                           | <b>0</b> | <b>1</b> | <b>2</b> |
| Female                                                     | 218      | 227      | 45       |
| Male                                                       | 236      | 255      | 80       |
| <b>10:56525802_CT_C</b>                                    | <b>0</b> | <b>1</b> | <b>2</b> |
| Female                                                     | 76       | 21       | 9        |
| Male                                                       | 101      | 68       | 13       |

514

515

516

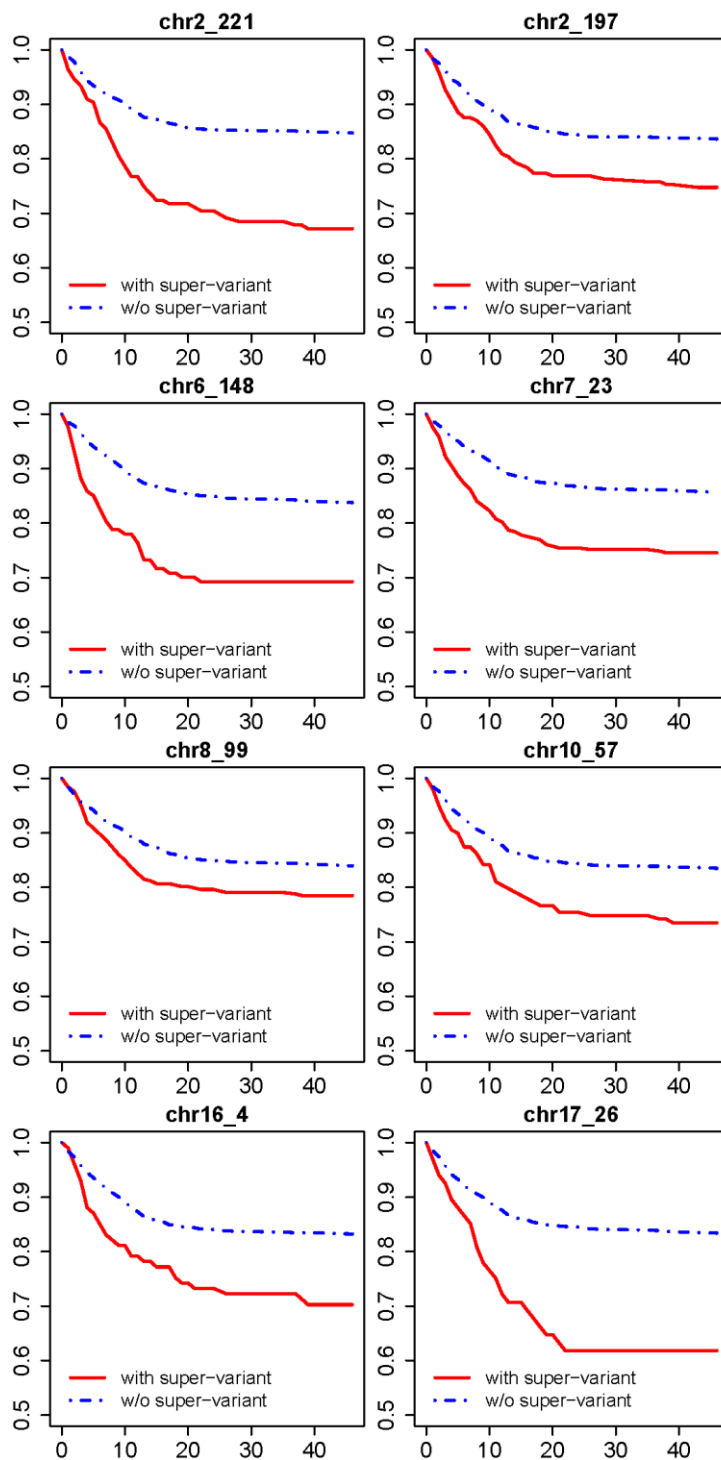

517

518 Figure 1: Survival curves of 8 identified super-variants in the complete dataset. The x-  
519 axis represents days since testing, and the y-axis represents the survival probability.



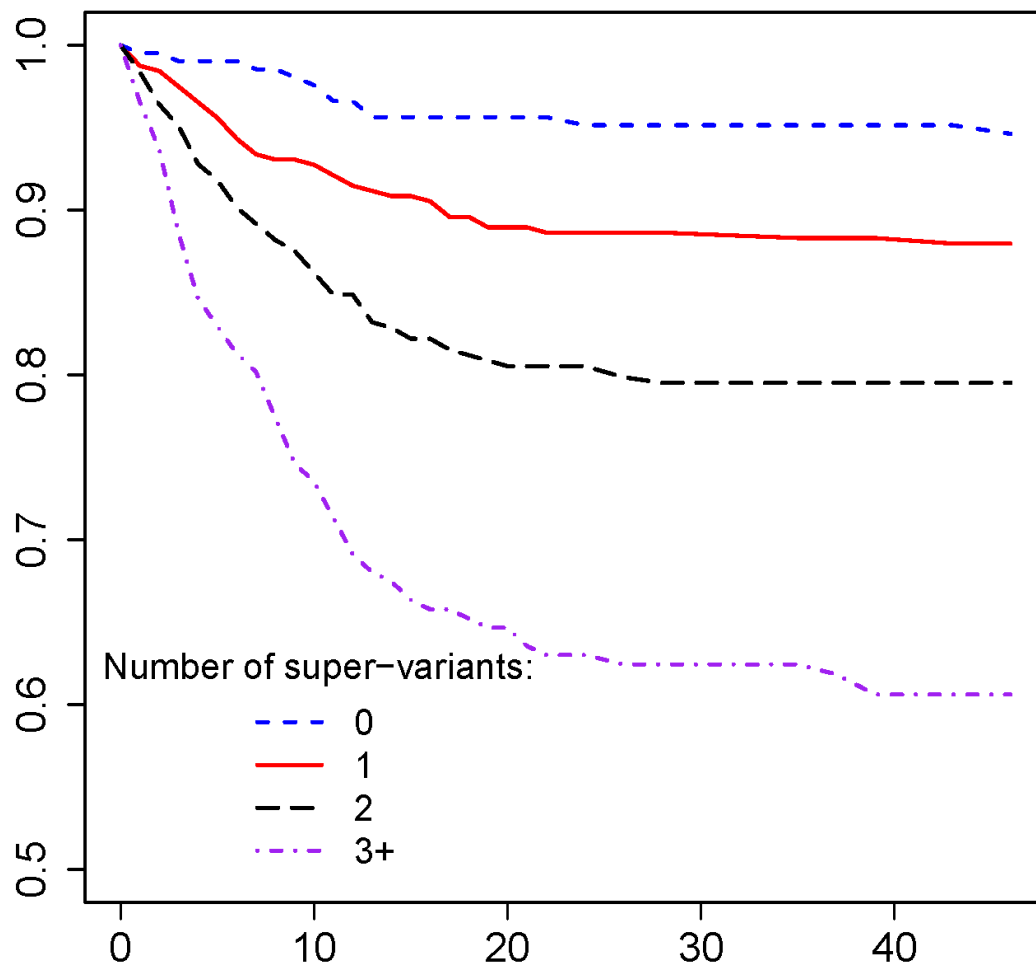

520

521 Figure 2: Survival curves stratified by the number of super-variants in the complete  
522 dataset. The x-axis represents days since testing, and the y-axis represents the survival  
523 probability.

524

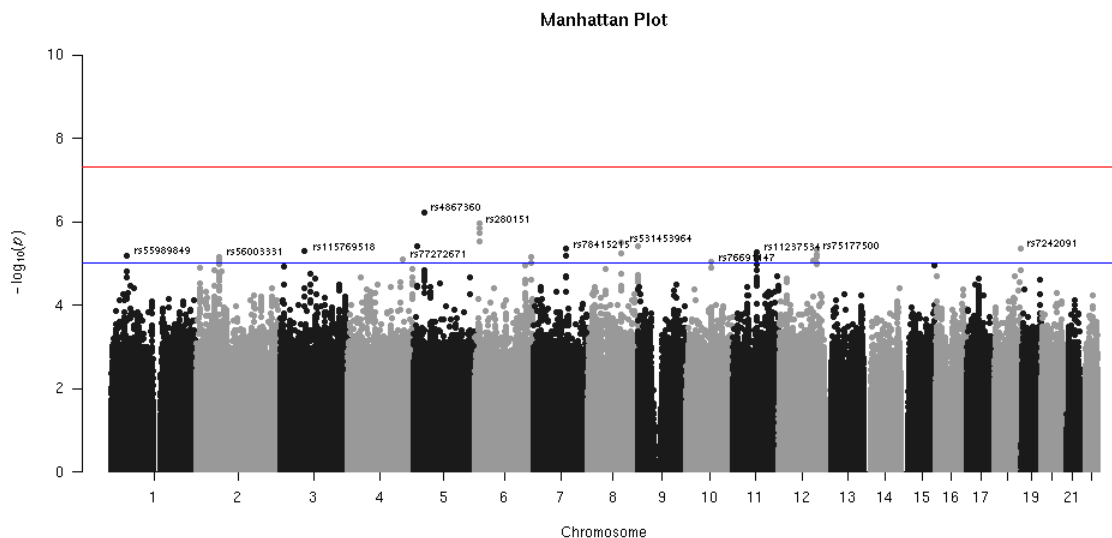

525

526 Figure 3: Manhattan plot of traditional single SNP association analysis based on samples

527 with white British ancestry only and controlled for gender and age. The red horizontal

528 line corresponds to the commonly adopted genome-wide significant level at  $5 \times 10^{-8}$ , and

529 the blue horizontal line gives to the suggestive significant level at  $1 \times 10^{-5}$ . Top SNPs

530 above the suggestive line in each chromosome are annotated.
